# Supplementary material
Source: ML conference proceedings conference paper supplement (https://openreview.net/forum?id=jZQOWas0Lo3)
Supplement: supplementary_material [file attachment]

version https://git-lfs.github.com/spec/v1
oid sha256:273dd9a67b20bc7ec3721d606a5842c6a1544201d09889d95844f06ebfdfb3ab
size 10767108
